# Supplementary material for: Aligned fibers direct collective cell migration to engineer closing and nonclosing wound gaps
Source: PubMed Central journal article supplement — Mol Biol Cell. 2017 Sep 15;28(19):2579–88. doi: 10.1091/mbc.E17-05-0305 (PMC5597329; doi:10.1091/mbc.e17-05-0305), 2017-09-15

# Supplemental Materials

*Molecular Biology of the Cell*

Sharma et al.

## **Aligned fibers direct collective cell migration to engineer closing and non-closing wound gaps**

Puja Sharma<sup>1</sup>, Colin Ng<sup>2</sup>, Aniket Jana<sup>2</sup>, Abinash Padhi<sup>2</sup>, Paige Szymanski<sup>3</sup>, Jerry S. H. Lee<sup>4,5</sup>, Bahareh Behkam<sup>1,2</sup>, Amrinder S. Nain<sup>1,2\*</sup>

<sup>1</sup>School of Biomedical Engineering and Sciences, Virginia Tech, Blacksburg, VA 24061, USA.

<sup>2</sup>Mechanical Engineering Department, Virginia Tech, Blacksburg, VA 24061, USA.

<sup>3</sup>Department of Bioengineering, University of Illinois at Urbana-Champaign, Urbana, IL 61801, USA.

<sup>4</sup>Center for Strategic Scientific Initiatives, National Cancer Institute, National Institute of Health, Bethesda, MD. 20892, USA

<sup>5</sup>Chemical and Biomolecular Engineering Department, Johns Hopkins University, Baltimore, MD, 21218, USA.

\* Corresponding authoremail: [nain@vt.edu](mailto:nain@vt.edu)

**Supplementary Figures:**

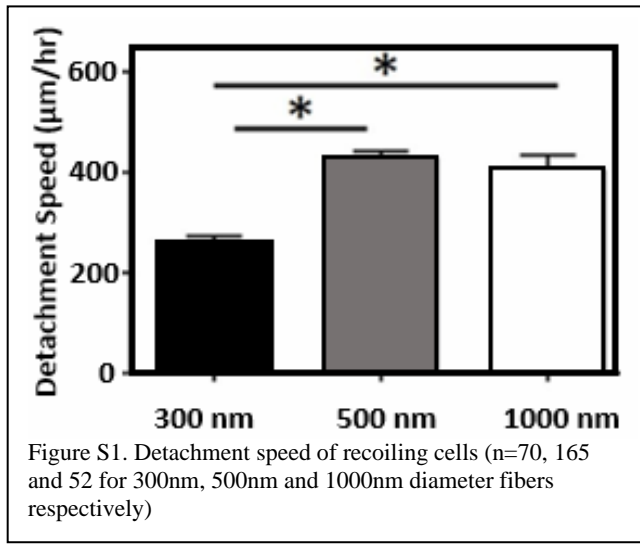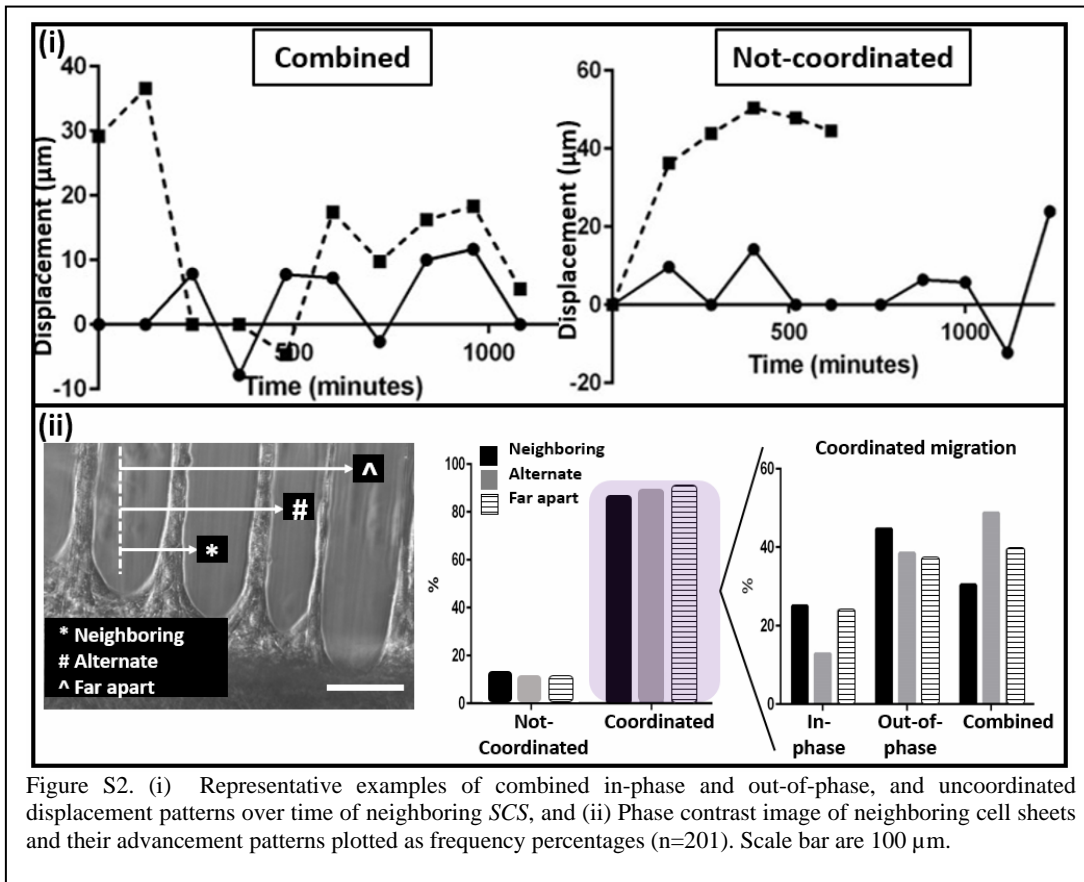

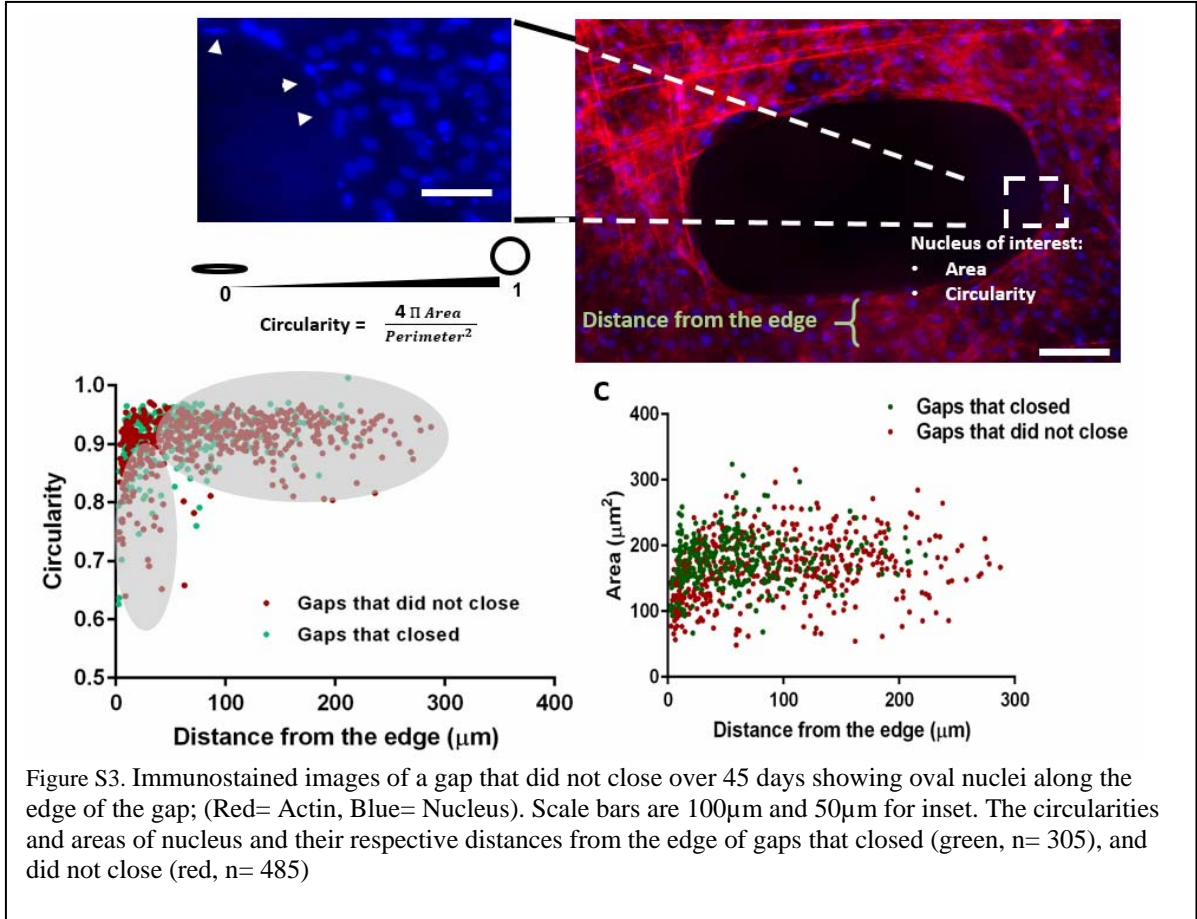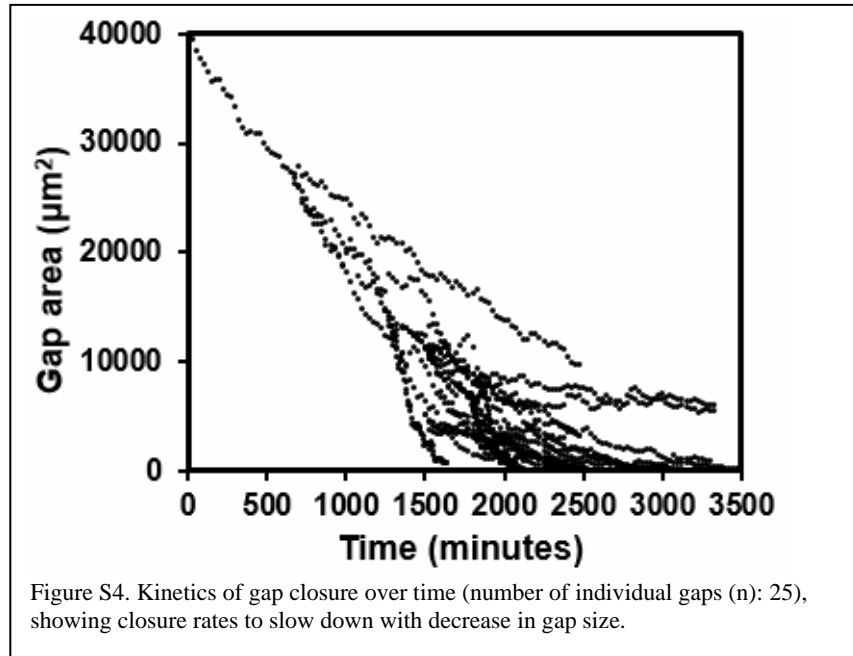

Supplement: supp_E17-05-0305v1_CombinedSupMats.pdf [file supp_E17-05-0305v1_CombinedSupMats.pdf]
